# Supplementary material
Source: MDPI journal article supplement (https://www.mdpi.com/2072-4292/8/1/67)
Supplement: s1 [file s1]

**Supplementary Materials: Decadal scale changes in glacier area in the Hohe Tauern National Park (Austria) determined by Object-Based Image Analysis**

Benjamin Aubrey Robson, Daniel Hölbling, Christopher Nuth, Tazio Stozzi and Svein Olaf Dahl

**Table S1.** Measured Glacier Areas within the Hohe Tauern National Park. The datasets from 1969 and 1998 are from the Austrian Glacier Inventories. The datasets from 1985. 2003 and 2013 are from OBIA classifications.

| **Glacier ID** | **Glacier Name** | **Glacier Area** | | | | | **Total Change (1969**–**2013) (%)** |
| --- | --- | --- | --- | --- | --- | --- | --- |
|  |  | **1969** | **1985** | **1998** | **2003** | **2013** |  |
| 4018 | Leiter Kees | 0.47 | 0.33 | 0.38 | 0.05 | 0.13 | −72 |
| 4020 | Hohenwart Kees E | 0.28 | 0.02 | 0.24 | 0.12 | 0.14 | −49 |
| 4022 | Schwerteck Kees E | 0.09 | 0.07 | 0.08 | 0.05 | 0.05 | −49 |
| 4023 | Schwerteck Kees M | 0.51 | 0.49 | 0.40 | 0.28 | 0.43 | −15 |
| 4024 | Schwerteck Kees W | 0.43 | 0.38 | 0.26 | 0.02 | 0.17 | −60 |
| 4025 | Kellersberg Kees | 0.18 | 0.16 | 0.12 | 0.03 | 0.11 | −40 |
| 4026 | Hofmas Kees | 1.17 | 1.12 | 1.09 | 0.82 | 0.88 | −25 |
| 4027 | Pasterzen Kees | 19.90 | 18.28 | 18.37 | 15.32 | 15.37 | −23 |
| 4028 | Wasserfallwinkel | 1.98 | 1.96 | 1.86 | 1.62 | 1.55 | −22 |
| 4030 | Freiwand (Magnes) Kees | 0.35 | 0.27 | 0.32 | 0.19 | 0.17 | −51 |
| 4034 | Grosser Fleiss Kees | 0.40 | 0.24 | 0.35 | 0.17 | 0.15 | −63 |
| 4036 | Kleiner Fleiss Kees | 1.27 | 1.12 | 0.96 | 0.77 | 0.85 | −33 |
| 4037 | Zirknitz Kees | 0.10 | 0.11 | 0.11 | 0.03 | 0.07 | −29 |
| 5008 | Tischlerkar Kees M2 | 0.58 | 0.64 | 0.55 | 0.34 | 0.31 | −46 |
| 5012 |  | 0.05 | 0.07 | 0.04 | 0.00 | 0.04 | −21 |
| 5013 | Grubenkar Kees | 0.87 | 0.85 | 0.76 | 0.35 | 0.52 | −40 |
| 5019 | Sparaenger Kees E | 0.07 | 0.08 | 0.05 | 0.00 | 0.03 | −56 |
| 5021 | Schlappereben Kees | 0.79 | 0.75 | 0.68 | 0.07 | 0.62 | −22 |
| 5025 | Schareck Kees E | 0.41 | 0.43 | 0.33 | 0.05 | 0.30 | −27 |
| 5027 | Schareck Kees W | 0.20 | 0.20 | 0.16 | 0.03 | 0.12 | −39 |
| 5028 |  | 0.10 | 0.07 | 0.07 | 0.00 | 0.04 | −58 |
| 5030 | Vogelmaier Ochsenkar Kees un. | 1.28 | 1.21 | 1.11 | 0.61 | 0.62 | −52 |
| 5031 | Vogelmaier Ochsenkar Kees ob. | 0.40 | 0.42 | 0.39 | 0.22 | 0.26 | −34 |
| 5034 | Pilatus Kees | 0.47 | 0.30 | 0.47 | 0.13 | 0.13 | −72 |
| 5035 | Hocharn Kees S | 0.31 | 0.35 | 0.27 | 0.07 | 0.17 | −44 |
| 5036 | Hocharn Kees N | 0.75 | 1.05 | 0.74 | 0.47 | 0.50 | −33 |
| 5037 |  | 0.15 | 0.15 | 0.11 | 0.00 | 0.07 | −52 |
| 5038 | Krummel Kees | 1.03 | 1.09 | 0.93 | 0.53 | 0.68 | −34 |
| 5039 |  | 0.22 | 0.26 | 0.21 | 0.10 | 0.17 | −22 |
| 5040 | Weissenbach Kees | 1.24 | 1.40 | 0.87 | 0.36 | 0.52 | −58 |
| 5043 | Brekogel Kees | 0.62 | 0.57 | 0.39 | 0.00 | 0.23 | −63 |
| 5045 | Spielma Kees E | 0.39 | 0.37 | 0.27 | 0.19 | 0.22 | −44 |
| 5046 | Spielma Kees W | 0.14 | 0.14 | 0.07 | 0.04 | 0.08 | −42 |
| 5050 | Fuscherkar Kees | 1.27 | 0.14 | 0.89 | 0.47 | 0.81 | −36 |
| 5051 | Bockkar Kees | 3.53 | 3.51 | 3.26 | 2.73 | 2.94 | −17 |
| 5053 | Hochgruber Kees | 1.84 | 1.90 | 1.75 | 1.36 | 1.43 | −22 |
| 5054 | Teufelsmuehl Kees | 0.77 | 0.76 | 0.60 | 0.47 | 0.61 | −21 |
| 5055 | Boggenei Kees | 0.29 | 0.10 | 0.27 | 0.06 | 0.13 | −57 |
| 5056 | Sandboden Kees | 0.77 | 0.76 | 0.72 | 0.23 | 0.79 | 3 |
| 5058 | Walcher Kees | 0.98 | 0.87 | 0.78 | 0.64 | 0.98 | 0 |
| 5061 | Hirzbach Kees ob. | 0.30 | 0.41 | 0.14 | 0.13 | 0.22 | −28 |
| 5063 | Brach Kees | 0.27 | 0.18 | 0.22 | 0.06 | 0.11 | −60 |
| 5066 | Wielinger Kees | 1.02 | 0.91 | 0.76 | 0.61 | 0.99 | −2 |
| 5067 | Foschez Kees | 0.23 | 0.19 | 0.15 | 0.07 | 0.14 | −37 |
| 5068 | Kaindl Kees | 0.45 | 0.48 | 0.38 | 0.32 | 0.51 | 13 |
| 5069 | Oberer Klockerin Kees | 0.31 | 0.28 | 0.18 | 0.12 | 0.26 | −17 |
| 5070 | Klockerin Kees | 0.58 | 0.18 | 0.48 | 0.00 | 0.08 | −86 |
| 5071 | Baerenkopf Kees | 2.32 | 2.27 | 2.12 | 1.86 | 2.26 | −3 |
| 5072 | Schwarzkoepfl Kees | 0.71 | 0.63 | 0.63 | 0.03 | 0.23 | −67 |
| 5073 | Karlinger Kees | 4.41 | 3.98 | 3.78 | 2.66 | 2.99 | −32 |
| 5091 | Unterer Riffl Kees | 1.02 | 1.01 | 0.88 | 0.59 | 0.69 | −32 |
| 5094 | Oedenwinkel Kees | 2.26 | 1.77 | 2.06 | 1.38 | 1.52 | −33 |
| 5097 | Soblick Kees | 1.76 | 1.57 | 1.50 | 1.13 | 0.93 | −47 |
| 5113 | Abreder Kees | 0.22 | 0.20 | 0.14 | 0.04 | 0.06 | −73 |
| 5114 | Kratzenberg Kees | 0.36 | 0.42 | 0.31 | 0.11 | 0.15 | −58 |
| 5115 | Watzfeld Kees S | 0.18 | 0.15 | 0.09 | 0.06 | 0.07 | −62 |
| 5116 | Watzfeld Kees N | 0.55 | 0.46 | 0.35 | 0.22 | 0.20 | −63 |
| 5117 | Habach Kees | 3.57 | 3.69 | 3.29 | 2.21 | 2.12 | −41 |
| 5118 | Suedliches Leiterkeesl | 0.26 | 0.24 | 0.23 | 0.15 | 0.16 | −40 |
| 5121 |  | 0.35 | 0.35 | 0.27 | 0.11 | 0.24 | −31 |
| 5123 | Untersulzbach Kees | 3.96 | 3.75 | 3.72 | 2.97 | 3.01 | −24 |
| 5124 | Untersulzbach Kees W | 0.26 | 0.27 | 0.24 | 0.20 | 0.17 | −32 |
| 5125 | Kaeferfeld Kees | 2.79 | 2.86 | 2.49 | 1.92 | 1.78 | −36 |
| 5127 |  | 0.22 | 0.22 | 0.18 | 0.09 | 0.14 | −38 |
| 5128 |  | 0.49 | 0.54 | 0.44 | 0.25 | 0.29 | −41 |
| 5129 | Obersulzbach Kees | 12.17 | 11.96 | 11.01 | 9.49 | 8.96 | −26 |
| 5130 | Oestliches Sotags Kees | 2.69 | 2.86 | 2.45 | 2.04 | 1.84 | −32 |
| 5131 | Grosser Jaidbach Kees | 1.05 | 1.09 | 0.93 | 0.71 | 0.60 | −43 |
| 5132 | Kleiner Jaidbach Kees | 0.84 | 0.83 | 0.73 | 0.54 | 0.48 | −42 |
| 5136 | Westliches Jaidbach Kees | 0.78 | 0.73 | 0.71 | 0.55 | 0.49 | −37 |
| 5137 | Schliefer Kees N | 0.19 | 1.15 | 0.16 | 0.04 | 0.07 | −63 |
| 5138 | Schliefer Kees M | 0.07 | 0.06 | 0.06 | 0.02 | 0.05 | −29 |
| 5139 | Schliefer Kees S | 0.09 | 0.09 | 0.08 | 0.03 | 0.06 | −37 |
| 5140 | Westliches Sotags Kees | 0.67 | 0.70 | 0.49 | 0.22 | 0.30 | −56 |
| 5141 | Krimmler Kees | 5.50 | 5.16 | 4.88 | 3.60 | 3.39 | −38 |
| 5150 | Seekar Kees N | 0.20 | 0.20 | 0.18 | 0.09 | 0.13 | −37 |
| 5152 | Keeskar Kees | 0.98 | 0.94 | 0.88 | 0.61 | 0.54 | −44 |
| 5153 |  | 0.11 | 0.96 | 0.09 | 0.02 | 0.06 | −52 |
| 5154 | Rainbach Kees | 0.89 | 0.87 | 0.82 | 0.42 | 0.44 | −51 |
| 5156 | Weisskar Kees S | 0.33 | 0.30 | 0.31 | 0.20 | 0.18 | −46 |
| 5157 | Weisskar Kees N | 0.29 | 0.23 | 0.24 | 0.12 | 0.13 | −54 |
| 5158 | Waldbergkar Kees | 0.23 | 0.19 | 0.15 | 0.05 | 0.09 | −63 |
| 6033 | Welitz Kees S | 1.04 | 1.19 | 0.95 | 0.89 | 0.73 | −30 |
| 6034 | Welitz Kees M | 0.57 | 0.85 | 0.52 | 0.46 | 0.33 | −42 |
| 6039 | Althaus Kees | 0.78 | 0.88 | 0.69 | 0.45 | 0.42 | −45 |
| 6040 | Umbal Kees | 5.20 | 5.01 | 4.73 | 4.06 | 4.13 | −20 |
| 6042 | Gubach Kees S | 0.25 | 0.20 | 0.17 | 0.04 | 0.11 | −54 |
| 6044 | Malham Kees N | 0.67 | 0.69 | 0.50 | 0.23 | 0.48 | −29 |
| 6045 | Simony Kees | 2.91 | 2.81 | 2.56 | 1.88 | 1.61 | −45 |
| 6046 | Maurer Kees W | 1.48 | 1.50 | 1.41 | 1.34 | 1.27 | −14 |
| 6048 | Maurer Kees M | 2.39 | 2.59 | 2.12 | 1.62 | 1.92 | −20 |
| 6049 | Maurer Kees E | 0.87 | 0.94 | 0.73 | 0.55 | 0.60 | −31 |
| 6052 | Dorfer Kees | 4.55 | 4.13 | 3.80 | 2.79 | 1.08 | −76 |
| 6053 | Rainer Kees | 3.63 | 4.01 | 3.51 | 3.39 | 3.36 | −7 |
| 6054 | Mullwitz Kees | 3.52 | 3.61 | 3.24 | 3.01 | 2.95 | −16 |
| 6055 | Garaneber Kees N | 0.54 | 0.46 | 0.38 | 0.27 | 0.28 | −48 |
| 6056 | Garaneber Kees S | 0.61 | 0.46 | 0.36 | 0.15 | 0.19 | −68 |
| 6058 | Nill Kees | 0.25 | 0.16 | 0.16 | 0.00 | 0.12 | −49 |
| 6063 | Mailfrosnitz Kees | 1.11 | 0.50 | 0.56 | 0.20 | 0.18 | −84 |
| 6064 | Mailfrosnitz Kees N | 0.14 | 0.08 | 0.06 | 0.00 | 0.08 | −45 |
| 6065 | Hohe Achsel | 0.10 | 0.08 | 0.08 | 0.00 | 0.08 | −21 |
| 6066 | Frosnitz Kees | 2.95 | 2.85 | 2.73 | 2.19 | 1.98 | −33 |
| 6067 | Kristallwand Kees | 0.36 | 0.37 | 0.27 | 0.18 | 0.17 | −53 |
| 6073 | Knorr Kees E | 0.26 | 0.17 | 0.15 | 0.07 | 0.11 | −58 |
| 6074 | Knorr Kees W | 0.19 | 0.09 | 0.14 | 0.05 | 0.06 | −70 |
| 6075 | Karles Kees | 0.60 | 0.61 | 0.48 | 0.33 | 0.32 | −46 |
| 6077 | Schlaten Kees | 9.68 | 9.59 | 9.32 | 7.88 | 7.74 | −20 |
| 6078 | Viltragen Kees | 2.47 | 2.43 | 2.13 | 1.64 | 1.57 | −36 |
| 6079 |  | 0.26 | 0.29 | 0.21 | 1.62 | 0.15 | −42 |
| 6080 |  | 0.18 | 0.19 | 0.14 | 0.00 | 0.16 | −11 |
| 6081 | Noerdlicher Viltragen Kees | 1.30 | 1.36 | 1.14 | 0.75 | 0.84 | −36 |
| 6082 |  | 0.11 | 0.12 | 0.09 | 0.05 | 0.14 | 33 |
| 6083 |  | 0.10 | 0.17 | 0.11 | 0.00 | 0.09 | −13 |
| 6084 | Gschloess Kees W | 0.09 | 0.11 | 0.05 | 0.00 | 0.04 | −57 |
| 6085 | Gschloess Kees E | 0.10 | 0.10 | 0.09 | 0.03 | 0.07 | −23 |
| 6088 | Daber Kees N | 0.38 | 0.50 | 0.37 | 0.18 | 0.30 | −19 |
| 6092 | Praegrat Kees | 1.00 | 1.00 | 0.90 | 0.65 | 0.54 | −46 |
| 6095 | Muntanitz Kees | 0.49 | 0.46 | 0.40 | 0.15 | 0.25 | −50 |
| 6096 |  | 0.19 | 0.10 | 0.10 | 0.03 | 0.06 | −67 |
| 6097 | Backtroeger Kees | 0.41 | 0.37 | 0.27 | 0.20 | 0.23 | −43 |
| 6098 | Gradoetz Kees | 1.19 | 0.92 | 0.73 | 0.52 | 0.54 | −55 |
| 6099 | Loames Kees S | 0.36 | 0.24 | 0.24 | 0.05 | 0.12 | −66 |
| 6100 | Loames Kees N | 0.30 | 0.26 | 0.24 | 0.13 | 0.13 | −58 |
| 6102 | Kalser Tauern Kees S | 0.22 | 0.20 | 0.18 | 0.11 | 0.11 | −52 |
| 6104 | Hinterer Kasten Kees ob. | 0.06 | 0.05 | 0.06 | 0.00 | 0.05 | −16 |
| 6105 | Hinterer Kasten Kees un. | 0.08 | 0.04 | 0.07 | 0.00 | 0.06 | −28 |
| 6106 | Vorderer Kasten Kees | 0.56 | 0.42 | 0.50 | 0.24 | 0.24 | −57 |
| 6107 | Laperwitz Kees | 2.23 | 2.32 | 2.18 | 1.81 | 1.80 | −19 |
| 6108 | Fruschnitz Kees | 2.82 | 2.92 | 2.69 | 2.53 | 2.70 | −4 |
| 6109 |  | 0.08 | 0.08 | 0.05 | 0.00 | 0.04 | −45 |
| 6110 | Teischnitz Kees | 2.10 | 2.03 | 1.93 | 1.65 | 1.68 | −20 |
| 6112 | Koednitz Kees | 1.41 | 1.40 | 1.37 | 0.94 | 1.02 | −27 |
| 9001 | Wildkar Kees | 0.40 | 0.30 | 0.26 | 0.13 | 0.17 | −58 |
| 9002 | Wildgerlos Kees E | 0.63 | 0.40 | 0.39 | 0.24 | 0.24 | −62 |
| 9003 | Wildgerlos Kees M | 2.10 | 1.96 | 1.98 | 1.42 | 1.41 | −33 |
| 21007 | Westlicher Tripp Kees | 0.67 | 0.66 | 0.63 | 0.31 | 0.42 | −37 |
| 21011 | Hochalm Kees | 3.14 | 3.14 | 2.90 | 2.33 | 2.53 | −19 |
| 21012 | Findlkar Kees | 0.74 | 0.77 | 0.43 | 0.07 | 0.30 | −59 |
| 21014 | Grosselend Kees | 2.92 | 2.91 | 2.47 | 0.88 | 1.83 | −37 |
| 21015 | Kaelberspitz Kees | 0.83 | 0.69 | 0.60 | 0.12 | 0.29 | −65 |
| 21016 | Plessnitz Kees un. | 0.25 | 0.23 | 0.12 | 0.00 | 0.07 | −71 |
| 21018 | Plessnitz Kees mi. S | 0.20 | 0.18 | 0.18 | 0.00 | 0.14 | −29 |
| 21021 | Schwarzhorn Kees | 0.09 | 0.09 | 0.07 | 0.00 | 0.07 | −21 |
| 21022 | Kleinelend Kees | 3.04 | 3.41 | 2.82 | 2.14 | 2.36 | −22 |
| 21023 | Tischlerspitz Kees | 0.48 | 0.43 | 0.42 | 0.16 | 0.21 | −56 |
| TOTAL |  | 181 | 175 | 160 | 118 | 124 | −33 |

**Table S2.** Total change in glacier area between 1969 and 2013 by different elevation classes.

| **Mean Elevation (m)** | **Glacier Area (km2)** | | **Change in Area (km2)** | **Change in Area (%)** |
| --- | --- | --- | --- | --- |
|  | **1969** | **2013** |  |  |
| <2600 | 6.12 | 2.89 | −3.2 | −53 |
| 2600–2700 | 11.33 | 6.75 | −4.6 | −40 |
| 2700–2800 | 47.09 | 30.64 | −16.5 | −35 |
| 2800–2900 | 43.87 | 31.12 | −12.8 | −29 |
| 2900–3000 | 39.13 | 26.60 | −12.5 | −32 |
| 3000–3100 | 17.60 | 12.78 | −4.8 | −27 |
| >3100 | 10.61 | 9.39 | −1.2 | −12 |

**Table S3.** Total change in glacier area between 1969 and 2013 by different size classes.

| **Glacier Size (km2)** | **Glacier Area (km2)** | | **Change in Area (km2)** | **Change in Area (%)** |
| --- | --- | --- | --- | --- |
|  | **1969** | **2013** |  |  |
| <0.5 | 19.26 | 8.66 | −10.6 | −55 |
| 0.5–1 | 21.02 | 12.09 | −8.9 | −42 |
| 1–2.5 | 41.36 | 26.92 | −14.4 | −35 |
| 2.5–5 | 47.12 | 36.58 | −10.5 | −22 |
| 5.0–10.0 | 20.38 | 15.26 | −5.1 | −25 |
| >10 | 32.07 | 24.33 | −7.7 | −24 |

**Table S4.** Total change in glacier area between 1969 and 2013 by aspect.

| **Aspect** | **Glacier Area (km2)** | | **Change in Area (%)** |
| --- | --- | --- | --- |
|  | **1969** | **2013** |  |
| N | 0 | 0 | 0 |
| NNE | 0.26 | 0.17 | −32 |
| ENE | 6.11 | 4.09 | −33 |
| E | 32.78 | 22.16 | −32 |
| ESE | 43.38 | 31.28 | −28 |
| SSE | 13.78 | 6.69 | −51 |
| S | 9.82 | 5.77 | −41 |
| SSW | 37.45 | 28.48 | −24 |
| WSW | 17.41 | 12.65 | −27 |
| W | 14.24 | 8.56 | −40 |
| WNW | 0.59 | 0.25 | −57 |
| NWN | 0.58 | 0.31 | −46 |

**Table S5.** Measured amount of supraglacial debris within the Hohe Tauern’National Park compared with the total glacier (clean ice and debris covered ice) area.

| **Glacier ID** | **1985 Debris** | **1985 Total Glacier** | **2003 Debris** | **Debris Area Change  1985–2003 (%)** | **2003 Total Glacier** | **Total Area Change 1985–2003 (%)** | **2013 Debris** | **Debris Area Change  2003–2013 (%)** | **2013 Total Glacier** | **Total Area Change 2003–2013 (%)** | **Debris Area Change 1985–2013 (%)** | **Total Area Change 1985–2013 (%)** |
| --- | --- | --- | --- | --- | --- | --- | --- | --- | --- | --- | --- | --- |
| 6077 | 0.58 | 9.59 | 0.50 | −14 | 7.88 | −18 | 0.81 | 61 | 0.90 | −3 | −100 | −28 |
| 5091 | 0.25 | 1.01 | 0.44 | 76 | 0.59 | −42 | 0.36 | −18 | 0.41 | −30 | 22 | −16 |
| 5094 | 0.47 | 1.77 | 0.47 | 1 | 1.38 | −22 | 0.27 | −43 | 0.86 | −38 | −42 | −52 |
| 4027 | 0.86 | 18.28 | 0.65 | −25 | 15.32 | −16 | 1.06 | 63 | 15.37 | 0 | 45 | −59 |
| 5129 | 0.39 | 11.96 | 0.07 | −81 | 9.49 | −21 | 0.00 | −100 | 8.63 | −9 | 39 | −20 |
| *Total* | *3.37* | *42.23* | *2.15* | *−36* | *34.66* | *−19* | *3.38* | *57* | *32.93* | *−5* | *0* | *−*23 |

**Table S6.** Comparison between the 2003 OBIA classification outlines (OBIA_2003) and the 2003 glacier outlines submitted to GLIMS (by Paul *et al.* (2011 (2003 GLIMS)). as well as a comparison between the 2013 OBIA classification outlines and the 2013 manually corrected outlines (2013_Man).

| **Glacier ID** | **Glacier Name** | **OBIA_2003 (km2)** | **2003 GLIMS (km2)** | **Accuracy (%)** | **OBIA_2013 (km2)** | **2013_Man (km2)** | **Accuracy (%)** |
| --- | --- | --- | --- | --- | --- | --- | --- |
| 4018 | Leiter Kees | 0.05 | 0.15 | 34 | 0.16 | 0.13 | 84 |
| 4020 | Hohenwart Kees E | 0.12 | 0.12 | 96 | 0.10 | 0.14 | 72 |
| 4022 | Schwerteck Kees E | 0.05 | 0.04 | 76 | 0.02 | 0.05 | 51 |
| 4023 | Schwerteck Kees M | 0.28 | 0.28 | 99 | 0.47 | 0.43 | 92 |
| 4024 | Schwerteck Kees W | 0.02 | 0.04 | 45 | 0.14 | 0.17 | 80 |
| 4025 | Kellersberg Kees | 0.03 | 0.03 | 92 | 0.11 | 0.11 | 99 |
| 4026 | Hofmas Kees | 0.82 | 0.91 | 90 | 0.85 | 0.88 | 97 |
| 4027 | Pasterzen Kees | 15.32 | 17.79 | 86 | 15.37 | 15.37 | 100 |
| 4028 | Wasserfallwinkel | 1.62 | 1.62 | 100 | 1.52 | 1.55 | 98 |
| 4030 | Freiwand (Magnes) Kees | 0.19 | 0.25 | 76 | 0.14 | 0.17 | 78 |
| 4034 | Grosser Fleiss Kees | 0.17 | 0.14 | 84 | 0.14 | 0.15 | 98 |
| 4036 | Kleiner Fleiss Kees | 0.77 | 0.80 | 96 | 0.85 | 0.85 | 100 |
| 4037 | Zirknitz Kees | 0.03 | 0.03 | 100 | 0.04 | 0.07 | 62 |
| 5008 | Tischlerkar Kees M2 | 0.34 | 0.37 | 93 | 0.28 | 0.31 | 91 |
| 5012 |  |  |  |  | 0.04 | 0.04 | 95 |
| 5013 | Grubenkar Kees | 0.35 | 0.37 | 94 | 0.51 | 0.52 | 99 |
| 5019 | Sparaenger Kees E |  |  |  | 0.02 | 0.03 | 55 |
| 5021 | Schlappereben Kees | 0.07 | 0.07 | 100 | 0.56 | 0.62 | 91 |
| 5025 | Schareck Kees E | 0.05 | 0.15 | 36 | 0.32 | 0.30 | 92 |
| 5027 | Schareck Kees W | 0.03 | 0.03 | 100 | 0.08 | 0.12 | 68 |
| 5028 |  |  |  |  | 0.03 | 0.04 | 74 |
| 5030 | Vogelmaier Ochsenkar Kees un. | 0.61 | 0.71 | 85 | 0.61 | 0.62 | 99 |
| 5031 | Vogelmaier Ochsenkar Kees ob. | 0.22 | 0.24 | 91 | 0.32 | 0.26 | 81 |
| 5034 | Pilatus Kees | 0.13 | 0.13 | 96 | 0.13 | 0.13 | 99 |
| 5035 | Hocharn Kees S | 0.07 | 0.08 | 86 | 0.17 | 0.17 | 96 |
| 5036 | Hocharn Kees N | 0.47 | 0.46 | 99 | 0.50 | 0.50 | 99 |
| 5037 |  |  |  |  | 0.05 | 0.07 | 74 |
| 5038 | Krummel Kees | 0.53 | 0.51 | 98 | 0.59 | 0.68 | 87 |
| 5039 |  | 0.10 | 0.12 | 82 | 0.14 | 0.17 | 84 |
| 5040 | Weissenbach Kees | 0.36 | 0.31 | 85 | 0.50 | 0.52 | 96 |
| 5043 | Brekogel Kees | 0.00 | 0.04 | 0 | 0.21 | 0.23 | 90 |
| 5045 | Spielma Kees E | 0.19 | 0.16 | 79 | 0.18 | 0.22 | 82 |
| 5046 | Spielma Kees W | 0.04 | 0.03 | 56 | 0.05 | 0.08 | 59 |
| 5050 | Fuscherkar Kees | 0.47 | 0.51 | 91 | 0.73 | 0.81 | 90 |
| 5051 | Bockkar Kees | 2.73 | 2.74 | 100 | 2.79 | 2.94 | 95 |
| 5053 | Hochgruber Kees | 1.36 | 1.40 | 97 | 1.43 | 1.43 | 100 |
| 5054 | Teufelsmuehl Kees | 0.47 | 0.52 | 91 | 0.67 | 0.61 | 89 |
| 5055 | Boggenei Kees | 0.06 | 0.07 | 77 | 0.08 | 0.13 | 63 |
| 5056 | Sandboden Kees | 0.23 | 0.26 | 88 | 0.68 | 0.79 | 86 |
| 5058 | Walcher Kees | 0.64 | 0.65 | 100 | 0.83 | 0.98 | 84 |
| 5061 | Hirzbach Kees ob. | 0.13 | 0.13 | 94 | 0.11 | 0.22 | 50 |
| 5063 | Brach Kees | 0.06 | 0.08 | 79 | 0.11 | 0.11 | 99 |
| 5066 | Wielinger Kees | 0.61 | 0.57 | 92 | 0.77 | 0.99 | 77 |
| 5067 | Foschez Kees | 0.07 | 0.07 | 99 | 0.09 | 0.14 | 64 |
| 5068 | Kaindl Kees | 0.32 | 0.31 | 97 | 0.50 | 0.51 | 97 |
| 5069 | Oberer Klockerin Kees | 0.12 | 0.14 | 84 | 0.19 | 0.26 | 74 |
| 5070 | Klockerin Kees |  |  |  | 0.03 | 0.08 | 38 |
| 5071 | Baerenkopf Kees | 1.86 | 1.74 | 93 | 2.39 | 2.26 | 94 |
| 5072 | Schwarzkoepfl Kees | 0.03 | 0.53 | 6 | 0.16 | 0.23 | 70 |
| 5073 | Karlinger Kees | 2.66 | 2.87 | 92 | 3.04 | 2.99 | 98 |
| 5091 | Unterer Riffl Kees | 0.59 | 0.71 | 83 | 0.41 | 0.69 | 60 |
| 5094 | Oedenwinkel Kees | 1.38 | 1.37 | 99 | 0.86 | 1.52 | 56 |
| 5097 | Soblick Kees | 1.13 | 1.19 | 95 | 0.82 | 0.93 | 88 |
| 5113 | Abreder Kees | 0.04 | 0.06 | 65 | 0.05 | 0.06 | 86 |
| 5114 | Kratzenberg Kees | 0.11 | 0.13 | 82 | 0.17 | 0.15 | 87 |
| 5115 | Watzfeld Kees S | 0.06 | 0.07 | 75 | 0.05 | 0.07 | 75 |
| 5116 | Watzfeld Kees N | 0.22 | 0.26 | 84 | 0.14 | 0.20 | 70 |
| 5117 | Habach Kees | 2.21 | 2.41 | 92 | 2.05 | 2.12 | 97 |
| 5118 | Suedliches Leiterkeesl | 0.15 | 0.14 | 93 | 0.10 | 0.16 | 60 |
| 5121 |  | 0.11 | 0.11 | 99 | 0.26 | 0.24 | 94 |
| 5123 | Untersulzbach Kees | 2.97 | 2.74 | 92 | 2.85 | 3.01 | 95 |
| 5124 | Untersulzbach Kees W | 0.20 | 0.20 | 100 | 0.15 | 0.17 | 89 |
| 5125 | Kaeferfeld Kees | 1.92 | 1.91 | 100 | 1.69 | 1.78 | 95 |
| 5127 |  | 0.09 | 0.13 | 67 | 0.17 | 0.14 | 75 |
| 5128 |  | 0.25 | 0.27 | 91 | 0.29 | 0.29 | 98 |
| 5129 | Obersulzbach Kees | 9.49 | 10.02 | 95 | 8.63 | 8.96 | 96 |
| 5130 | Oestliches Sotags Kees | 2.04 | 2.09 | 98 | 1.69 | 1.84 | 92 |
| 5131 | Grosser Jaidbach Kees | 0.71 | 0.72 | 99 | 0.54 | 0.60 | 89 |
| 5132 | Kleiner Jaidbach Kees | 0.54 | 0.56 | 95 | 0.42 | 0.48 | 87 |
| 5136 | Westliches Jaidbach Kees | 0.55 | 0.58 | 94 | 0.45 | 0.49 | 92 |
| 5137 | Schliefer Kees N | 0.04 | 0.06 | 64 | 0.09 | 0.07 | 67 |
| 5138 | Schliefer Kees M | 0.02 | 0.02 | 96 | 0.06 | 0.05 | 66 |
| 5139 | Schliefer Kees S | 0.03 | 0.04 | 76 | 0.06 | 0.06 | 85 |
| 5140 | Westliches Sotags Kees | 0.22 | 0.24 | 95 | 0.35 | 0.30 | 81 |
| 5141 | Krimmler Kees | 3.60 | 4.05 | 89 | 3.27 | 3.39 | 97 |
| 5150 | Seekar Kees N | 0.09 | 0.09 | 93 | 0.13 | 0.13 | 100 |
| 5152 | Keeskar Kees | 0.61 | 0.64 | 96 | 0.41 | 0.54 | 76 |
| 5153 |  | 0.02 | 0.03 | 78 | 0.05 | 0.06 | 95 |
| 5154 | Rainbach Kees | 0.42 | 0.52 | 81 | 0.44 | 0.44 | 99 |
| 5156 | Weisskar Kees S | 0.20 | 0.24 | 83 | 0.15 | 0.18 | 82 |
| 5157 | Weisskar Kees N | 0.12 | 0.12 | 100 | 0.12 | 0.13 | 90 |
| 5158 | Waldbergkar Kees | 0.05 | 0.06 | 83 | 0.09 | 0.09 | 95 |
| 6033 | Welitz Kees S | 0.89 | 0.82 | 91 | 0.73 | 0.73 | 100 |
| 6034 | Welitz Kees M | 0.46 | 0.42 | 92 | 0.36 | 0.33 | 93 |
| 6039 | Althaus Kees | 0.45 | 0.47 | 96 | 0.34 | 0.42 | 81 |
| 6040 | Umbal Kees | 4.06 | 4.26 | 95 | 3.97 | 4.13 | 96 |
| 6042 | Gubach Kees S | 0.04 | 0.05 | 86 | 0.10 | 0.11 | 85 |
| 6044 | Malham Kees N | 0.23 | 0.22 | 92 | 0.30 | 0.48 | 63 |
| 6045 | Simony Kees | 1.88 | 1.96 | 96 | 1.91 | 1.61 | 81 |
| 6046 | Maurer Kees W | 1.34 | 1.26 | 94 | 1.33 | 1.27 | 95 |
| 6048 | Maurer Kees M | 1.62 | 1.56 | 96 | 2.04 | 1.92 | 94 |
| 6049 | Maurer Kees E | 0.55 | 0.53 | 97 | 0.65 | 0.60 | 91 |
| 6052 | Dorfer Kees | 2.79 | 2.85 | 98 | 2.85 | 1.08 | −64 |
| 6053 | Rainer Kees | 3.39 | 3.24 | 95 | 3.24 | 3.36 | 97 |
| 6054 | Mullwitz Kees | 3.01 | 2.94 | 98 | 2.82 | 2.95 | 95 |
| 6055 | Garaneber Kees N | 0.27 | 0.29 | 95 | 0.28 | 0.28 | 99 |
| 6056 | Garaneber Kees S | 0.15 | 0.14 | 93 | 0.15 | 0.19 | 76 |
| 6058 | Nill Kees | 0.00 | 0.05 | 0 | 0.14 | 0.12 | 88 |
| 6063 | Mailfrosnitz Kees | 0.20 | 0.22 | 91 | 0.15 | 0.18 | 83 |
| 6064 | Mailfrosnitz Kees N |  |  |  | 0.06 | 0.08 | 85 |
| 6065 | Hohe Achsel |  |  |  | 0.07 | 0.08 | 92 |
| 6066 | Frosnitz Kees | 2.19 | 2.16 | 99 | 1.88 | 1.98 | 95 |
| 6067 | Kristallwand Kees | 0.18 | 0.21 | 86 | 0.19 | 0.17 | 90 |
| 6073 | Knorr Kees E | 0.07 | 0.09 | 82 | 0.10 | 0.11 | 90 |
| 6074 | Knorr Kees W | 0.05 | 0.05 | 99 | 0.05 | 0.06 | 80 |
| 6075 | Karles Kees | 0.33 | 0.32 | 98 | 0.33 | 0.32 | 97 |
| 6077 | Schlaten Kees | 7.88 | 8.28 | 95 | 7.67 | 7.74 | 99 |
| 6078 | Viltragen Kees | 1.64 | 2.19 | 75 | 1.67 | 1.57 | 93 |
| 6080 |  | 0.00 | 0.01 | 0 | 0.15 | 0.15 | 98 |
| 6081 | Noerdlicher Viltragen Kees | 0.75 | 0.82 | 92 | 0.18 | 0.16 | 86 |
| 6082 |  | 0.05 | 0.06 | 76 | 0.87 | 0.84 | 96 |
| 6083 |  | 0.00 | 0.02 | 0 | 0.09 | 0.14 | 67 |
| 6084 | Gschloess Kees W |  |  |  | 0.09 | 0.09 | 97 |
| 6085 | Gschloess Kees E | 0.03 | 0.03 | 97 | 0.04 | 0.04 | 91 |
| 6088 | Daber Kees N | 0.18 | 0.18 | 97 | 0.08 | 0.07 | 95 |
| 6092 | Praegrat Kees | 0.65 | 0.63 | 96 | 0.31 | 0.30 | 98 |
| 6095 | Muntanitz Kees | 0.15 | 0.22 | 70 | 0.47 | 0.54 | 87 |
| 6096 |  | 0.03 | 0.04 | 74 | 0.23 | 0.25 | 91 |
| 6097 | Backtroeger Kees | 0.20 | 0.18 | 91 | 0.05 | 0.06 | 86 |
| 6098 | Gradoetz Kees | 0.52 | 0.50 | 98 | 0.21 | 0.23 | 92 |
| 6099 | Loames Kees S | 0.05 | 0.06 | 80 | 0.51 | 0.54 | 95 |
| 6100 | Loames Kees N | 0.13 | 0.14 | 99 | 0.09 | 0.12 | 71 |
| 6102 | Kalser Tauern Kees S | 0.11 | 0.12 | 92 | 0.10 | 0.13 | 77 |
| 6104 | Hinterer Kasten Kees ob. | 0.00 | 0.01 | 0 | 0.28 | 0.11 | −65 |
| 6105 | Hinterer Kasten Kees un. |  |  |  | 0.06 | 0.05 | 88 |
| 6106 | Vorderer Kasten Kees | 0.24 | 0.25 | 97 | 0.05 | 0.06 | 84 |
| 6107 | Laperwitz Kees | 1.81 | 1.71 | 94 | 0.21 | 0.24 | 89 |
| 6108 | Fruschnitz Kees | 2.53 | 2.57 | 98 | 1.66 | 1.80 | 92 |
| 6109 |  |  |  |  | 2.65 | 2.70 | 98 |
| 6110 | Teischnitz Kees | 1.65 | 1.64 | 99 | 0.04 | 0.04 | 88 |
| 6112 | Koednitz Kees | 0.94 | 1.00 | 94 | 1.66 | 1.68 | 99 |
| 9001 | Wildkar Kees | 0.13 | 0.13 | 100 | 0.90 | 1.02 | 88 |
| 9002 | Wildgerlos Kees E | 0.24 | 0.27 | 90 | 0.15 | 0.17 | 90 |
| 9003 | Wildgerlos Kees M | 1.42 | 1.56 | 91 | 0.24 | 0.24 | 99 |
| 21007 | Westlicher Tripp Kees | 0.31 | 0.32 | 98 | 1.54 | 1.41 | 91 |
| 21011 | Hochalm Kees | 2.33 | 2.34 | 100 | 0.42 | 0.42 | 99 |
| 21012 | Findlkar Kees | 0.07 | 0.09 | 80 | 2.37 | 2.53 | 94 |
| 21014 | Grosselend Kees | 0.88 | 1.57 | 56 | 0.24 | 0.30 | 79 |
| 21015 | Kaelberspitz Kees | 0.12 | 0.17 | 67 | 1.64 | 1.83 | 89 |
| 21016 | Plessnitz Kees un. |  |  |  | 0.26 | 0.29 | 89 |
| 21018 | Plessnitz Kees mi. S |  |  |  | 0.06 | 0.07 | 78 |
| 21021 | Schwarzhorn Kees | 0.00 | 0.02 | 0 | 0.13 | 0.14 | 91 |
| 21022 | Kleinelend Kees | 2.14 | 2.28 | 94 | 0.06 | 0.07 | 86 |
| 21023 | Tischlerspitz Kees | 0.16 | 0.16 | 100 | 2.23 | 2.36 | 95 |
| 4018 | Leiter Kees | 0.05 | 0.15 | 34 | 0.16 | 0.13 | 84 |
| TOTAL |  | 116.45 | 124.05 | 94 | 120.54 | 123.60 | 98 |

**Table S7.** Transient snowline elevation for glaciers larger than 0.2 km2 for 1985. 2003 and 2013.

| **Glacier ID** | **Transient Snowline Elevation (m.)** | | | **Total Change 1985–2013 (m)** |
| --- | --- | --- | --- | --- |
|  | **1985** | **2003** | **2013** |  |
| 6106 | 2808 | 2961 | 2846 | −38 |
| 5121 | 2900 |  | 2914 | −14 |
| 6095 | 2940 |  | 2962 | −22 |
| 6055 | 3080 |  | 3114 | −34 |
| 5128 | 3001 | 3075 | 3023 | −22 |
| 5140 | 2869 | 2984 | 2934 | −65 |
| 21012 | 2780 |  | 2877 | −97 |
| 6088 | 2677 |  | 2765 | −88 |
| 6034 | 3155 | 3170 | 3073 | 81 |
| 21007 | 2740 | 3149 | 3021 | −282 |
| 6039 | 3000 | 3092 | 3046 | −46 |
| 4023 | 3028 | 2943 | 3063 | −36 |
| 5154 | 2841 | 2980 | 2960 | −119 |
| 5136 | 2914 | 2965 | 2933 | −19 |
| 6092 | 2858 | 2974 | 2890 | −32 |
| 5152 | 2789 |  | 2897 | −107 |
| 6049 | 2910 | 3096 | 3016 | −106 |
| 5054 | 3111 | 3186 | 3171 | −60 |
| 5091 | 3042 |  | 3015 | 27 |
| 6033 | 3065 | 3213 | 3155 | −90 |
| 5056 | 2941 | 2847 | 2919 | 22 |
| 6081 | 2731 | 2857 | 2780 | −50 |
| 4026 | 3049 | 3329 | 3205 | −156 |
| 5097 | 2682 | 2927 | 2836 | −154 |
| 5058 | 2750 | 2749 | 2907 | −158 |
| 5066 | 3087 | 3048 | 3046 | 41 |
| 6112 | 3120 | 3251 | 3182 | −62 |
| 6052 | 2893 | 3111 | 3036 | −143 |
| 6046 | 2930 | 3101 | 3079 | −149 |
| 9003 | 2768 | 2832 | 2852 | −84 |
| 5053 | 2896 | 3106 | 3053 | −157 |
| 5094 | 2724 | 3045 | 2971 | −248 |
| 4028 | 2853 | 2965 | 2888 | −36 |
| 6078 | 2793 |  | 2979 | −186 |
| 6045 | 2836 | 3144 | 3072 | −236 |
| 6110 | 3223 | 3236 | 3188 | 34 |
| 5125 | 2851 | 2899 | 2924 | −74 |
| 6107 | 2936 | 3178 | 3097 | −161 |
| 21014 | 2811 |  | 2870 | −59 |
| 5130 | 2827 | 3037 | 2934 | −107 |
| 6048 | 2917 | 3073 | 3026 | −109 |
| 6066 | 2879 | 3120 | 3000 | −121 |
| 5117 | 2793 | 3011 | 2906 | −113 |
| 5071 | 3051 | 3074 | 3058 | −7 |
| 21022 | 2770 | 2918 | 2910 | −140 |
| 21011 | 2893 | 3065 | 3004 | −112 |
| 6108 | 3125 | 3277 | 3245 | −119 |
| 5051 | 2969 | 3055 | 3003 | −34 |
| 6054 | 2973 | 3202 | 3042 | −70 |
| 5073 | 2917 | 3078 | 3007 | −90 |
| 5123 | 2952 | 3139 | 3164 | −212 |
| 6053 | 2996 | 3262 | 3242 | −246 |
| 5141 | 2918 |  | 3002 | −84 |
| 6040 | 3004 | 3231 | 3124 | −120 |
| 6077 | 2846 | 3178 | 3089 | −243 |
| 5129 | 2879 | 3092 | 2924 | −45 |
| 4027 | 2941 | 3132 | 3041 | −100 |
| **Mean** | **2913** | **3071** | **3005** | **−92** |

**Table S8.** Transient snowline elevation for glaciers larger than 0.2 km2 by aspect.

| **Aspect** | **Transient Snowline Elevation (m.)** | | | **Total Change in Transient Snowline Elevation (m)** | **Total Change in Transient Snowline Elevation (%)** |
| --- | --- | --- | --- | --- | --- |
|  | **1985** | **2003** | **2013** |  |  |
| N |  |  |  |  |  |
| NNE | 2774 | 2859 |  | −85 | 100 |
| ENE | 2848 | 2897 | 2915 | −67 | −2 |
| E | 2823 | 2988 | 2945 | −122 | −4 |
| ESE | 2887 | 3055 | 3020 | −133 | −5 |
| SSE | 2811 | 3015 | 2923 | −112 | −4 |
| S | 2910 | 3086 | 2967 | −57 | −2 |
| SSW | 2900 | 3113 | 3022 | −122 | −4 |
| WSW | 2861 | 3090 | 3006 | −145 | −5 |
| W | 2878 | 2965 | 2942 | −64 | −2 |
| WNW | 2711 |  |  |  |  |
| NNW | 2814 |  |  |  |  |
| **Range** | **189** | **231** | **108** |  |  |
